# Supplementary material for: Hodgkin lymphoma arising in patients with chronic lymphocytic leukemia: outcomes from a large multi-center collaboration
Source: PubMed Central journal article supplement — Haematologica. 2020 Oct 5;106(11):2845–52. doi: 10.3324/haematol.2020.256388 (PMC8561295; doi:10.3324/haematol.2020.256388), 2020-10-05

## Hodgkin lymphoma arising in patients with chronic lymphocytic leukemia: outcomes from a large multi-center collaboration

Deborah M. Stephens,<sup>1</sup> Ken Boucher,<sup>1</sup> Elizabeth Kander,<sup>2</sup> Sameer A. Parikh,<sup>3</sup> Erin M. Parry,<sup>4</sup> Mazyar Shadman,<sup>5</sup> John M. Pagel,<sup>6</sup> Jennifer Cooperrider,<sup>7</sup> Joanna Rhodes,<sup>8</sup> Anthony Mato,<sup>9</sup> Allison Winter,<sup>10</sup> Brian Hill,<sup>10</sup> Sameh Gaballa,<sup>11</sup> Alexey Danilov,<sup>12</sup> Tycel Phillips,<sup>13</sup> Danielle M. Brander,<sup>14</sup> Sonali M. Smith,<sup>7</sup> Matthew S. Davids,<sup>4</sup> Kerry Rogers,<sup>2</sup> Martha J. Glenn<sup>1</sup> and John C. Byrd<sup>2</sup>

<sup>1</sup>Division of Hematology and Hematologic Malignancies, University of Utah, Salt Lake City, UT; <sup>2</sup>Division of Hematology, Ohio State University, Columbus, OH; <sup>3</sup>Division of Hematology, Mayo Clinic, Rochester, MN; <sup>4</sup>Division of Hematology, Dana Farber, Boston, MA; <sup>5</sup>Division of Hematology, Fred Hutch, Seattle, WA; <sup>6</sup>Division of Hematology and Oncology, Swedish Cancer Institute, Seattle, WA; <sup>7</sup>Division of Oncology, University of Chicago, Chicago, IL; <sup>8</sup>Division of Hematology, Northwell Health, New Hyde Park, NY; <sup>9</sup>Division of Hematology, Memorial Sloan Kettering Cancer Center, New York, NY; <sup>10</sup>Division of Hematology, Cleveland Clinic, Cleveland, OH; <sup>11</sup>Division of Oncology, Jefferson University, Philadelphia, PA; <sup>12</sup>Division of Hematology, City of Hope, Duarte, CA; <sup>13</sup>Division of Hematology, University of Michigan, Ann Arbor, MI and <sup>14</sup>Division of Hematology, Duke University, Durham, NC, USA

©2021 Ferrata Storti Foundation. This is an open-access paper. doi:10.3324/haematol.2020.256388

Received: April 22, 2020.

Accepted: September 24, 2020.

Pre-published: October 5, 2020.

Correspondence: *DEBORAH M. STEPHENS* - [deborah.stephens@hci.utah.edu](mailto:deborah.stephens@hci.utah.edu)

---

## Supplemental Tables

| <b>Supplementary Table 1. Number of Patients Identified at Each Site (Listed According to Number of Patients Contributed)</b> |                      |
|-------------------------------------------------------------------------------------------------------------------------------|----------------------|
| <b>Site</b>                                                                                                                   | <b># of Patients</b> |
| Mayo Clinic                                                                                                                   | 25                   |
| Ohio State University                                                                                                         | 19                   |
| Dana Farber Cancer Institute                                                                                                  | 14                   |
| Fred Hutch Cancer Center                                                                                                      | 6                    |
| Duke University                                                                                                               | 5                    |
| Swedish Cancer Institute                                                                                                      | 5                    |
| University of Chicago                                                                                                         | 5                    |
| University of Pennsylvania                                                                                                    | 5                    |
| Cleveland Clinic                                                                                                              | 4                    |
| Thomas Jefferson University                                                                                                   | 2                    |
| University of Utah                                                                                                            | 2                    |
| Oregon Health Science University                                                                                              | 1                    |
| University of Michigan                                                                                                        | 1                    |
| <i>Total</i>                                                                                                                  | <i>94</i>            |

| <b>Supplementary Table 2. List of Data Variables Collected for Patients with Chronic Lymphocytic Leukemia (CLL) with Transformation to Hodgkin Lymphoma (HL)</b>                                                                                                                                                 |
|------------------------------------------------------------------------------------------------------------------------------------------------------------------------------------------------------------------------------------------------------------------------------------------------------------------|
| Sex                                                                                                                                                                                                                                                                                                              |
| Age at CLL diagnosis                                                                                                                                                                                                                                                                                             |
| Rai Stage at CLL diagnosis                                                                                                                                                                                                                                                                                       |
| IGVH Mutational Status/Stereotype                                                                                                                                                                                                                                                                                |
| FISH for del13q, tri12, del11q, del17p at CLL diagnosis                                                                                                                                                                                                                                                          |
| B2 microglobulin at CLL diagnosis                                                                                                                                                                                                                                                                                |
| Presence of complex karyotype at CLL diagnosis                                                                                                                                                                                                                                                                   |
| TP53 status at CLL diagnosis                                                                                                                                                                                                                                                                                     |
| Name of CLL Therapies and Age at initiation of Therapy                                                                                                                                                                                                                                                           |
| Age at Hodgkin's diagnosis                                                                                                                                                                                                                                                                                       |
| HT Subtype (I/II)                                                                                                                                                                                                                                                                                                |
| Ann Arbor stage at HL Diagnosis                                                                                                                                                                                                                                                                                  |
| ECOG Performance Status at HL Diagnosis                                                                                                                                                                                                                                                                          |
| B symptoms at HL Diagnosis                                                                                                                                                                                                                                                                                       |
| Laboratory Values at HL Diagnosis: <ul style="list-style-type: none"> <li>• Lactate dehydrogenase</li> <li>• White blood cell count</li> <li>• Absolute lymphocyte Count</li> <li>• Hemoglobin</li> <li>• Platelet</li> <li>• Creatinine</li> <li>• Albumin</li> <li>• Erythrocyte sedimentation rate</li> </ul> |
| Size of Largest lymph node at HL diagnosis                                                                                                                                                                                                                                                                       |
| FISH for del13q, tri12, del11q, del17p at HL diagnosis                                                                                                                                                                                                                                                           |
| Presence of complex karyotype at HL diagnosis                                                                                                                                                                                                                                                                    |
| HL subtype (nodular sclerosing, mixed cellularity, lymphocyte rich, lymphocyte depleted)                                                                                                                                                                                                                         |
| Presence of Epstein Barr Virus in HL cells                                                                                                                                                                                                                                                                       |
| Name of HL Therapies and Age at Initiation of Therapy                                                                                                                                                                                                                                                            |
| Radiation Therapy Used and Age at Therapy                                                                                                                                                                                                                                                                        |
| Autologous or Allogeneic Hematopoietic Cell Transplantation Performed and Age of Therapy                                                                                                                                                                                                                         |
| Age at Last Follow Up                                                                                                                                                                                                                                                                                            |
| Age at Death if Deceased                                                                                                                                                                                                                                                                                         |

| <b>Supplemental Table 3. International Prognostic Score for Hodgkin Lymphoma<sup>12</sup></b>    |
|--------------------------------------------------------------------------------------------------|
| <i>One point is given for each of the characteristic below. Total score ranges from 0-7.</i>     |
| Absolute lymphocyte count < 0.6 x 10 <sup>9</sup> /L and/or < 8% of total white blood cell count |
| Age > 45 years                                                                                   |
| Hemoglobin < 10.5 g/dL                                                                           |
| Male gender                                                                                      |
| Serum albumin < 4 g/dL                                                                           |
| Stage IV disease                                                                                 |
| White blood cell count ≥ 15 x 10 <sup>9</sup> /L                                                 |

| <b>Supplemental Table 4. Richter Scoring System<sup>1</sup></b>                              |
|----------------------------------------------------------------------------------------------|
| <i>One point is given for each of the characteristic below. Total score ranges from 0-5.</i> |
| ECOG performance status > 1                                                                  |
| Lactate dehydrogenase > 1.5 times upper limit of normal                                      |
| Platelet count < 100 x 10 <sup>9</sup> /L                                                    |
| Prior therapy > 1                                                                            |
| Tumor size ≥ 5 cm                                                                            |

| <b>Supplemental Table 5. Regimens for Frontline Treatment of Hodgkin Transformation</b>                                                                                                                                |                      |
|------------------------------------------------------------------------------------------------------------------------------------------------------------------------------------------------------------------------|----------------------|
| Regimen                                                                                                                                                                                                                | Number (%)<br>N = 94 |
| <b>ABVD-Based</b>                                                                                                                                                                                                      | <b>62 (61)</b>       |
| ABVD                                                                                                                                                                                                                   | 45 (48)              |
| ABVD + Rituximab                                                                                                                                                                                                       | 1 (1)                |
| ABVD + Obinutuzumab                                                                                                                                                                                                    | 1 (1)                |
| <b>AVD-Based</b>                                                                                                                                                                                                       |                      |
| AVD                                                                                                                                                                                                                    | 5 (5)                |
| AV                                                                                                                                                                                                                     | 1 (1)                |
| AVD + Rituximab                                                                                                                                                                                                        | 3 (3)                |
| AVD + Ibrutinib                                                                                                                                                                                                        | 4 (4)                |
| AVD + Rituximab + Acalabrutinib                                                                                                                                                                                        | 1 (1)                |
| <b>Brentuximab Vedotin-Based</b>                                                                                                                                                                                       | <b>10 (11)</b>       |
| AVD + Brentuximab vedotin                                                                                                                                                                                              | 1 (1)                |
| Brentuximab vedotin                                                                                                                                                                                                    | 7 (7)                |
| Brentuximab vedotin + Rituximab                                                                                                                                                                                        | 1 (1)                |
| Brentuximab vedotin + Nivolumab                                                                                                                                                                                        | 1 (1)                |
| <b>RCHOP-Based</b>                                                                                                                                                                                                     | <b>7 (7)</b>         |
| <b>BCVPP</b>                                                                                                                                                                                                           | <b>3 (3)</b>         |
| <b>Bendamustine + Rituximab</b>                                                                                                                                                                                        | <b>1 (1)</b>         |
| <b>ICE</b>                                                                                                                                                                                                             | <b>1 (1)</b>         |
| <b>Etoposide</b>                                                                                                                                                                                                       | <b>1 (1)</b>         |
| <b>Vinblastine/Chlorambucil</b>                                                                                                                                                                                        | <b>1 (1)</b>         |
| <b>Rituximab</b>                                                                                                                                                                                                       | <b>1 (1)</b>         |
| <b>Radiation</b>                                                                                                                                                                                                       | <b>1 (1)</b>         |
| <b>No therapy</b>                                                                                                                                                                                                      | <b>6 (6)</b>         |
| ABVD = adriamycin, bleomycin, vinblastine, and dacarbazine; RCHOP = rituximab, cyclophosphamide, doxorubicin, vincristine, prednisone; BCVPP = carmustine, cyclophosphamide, vinblastine, procarbazine, and prednisone |                      |

| <b>Supplemental Table 6. Description of Salvage Regimens Received by HT Patients Relapsing after First Line of Therapy</b> |                          |                                                        |                            |                                      |                 |
|----------------------------------------------------------------------------------------------------------------------------|--------------------------|--------------------------------------------------------|----------------------------|--------------------------------------|-----------------|
| ID                                                                                                                         | HL Treatment #1          | HL Treatment #2                                        | HL Treatment #3            | HL Treatment #4                      | HL Treatment #5 |
| A                                                                                                                          | ABVD                     | ABVD                                                   | BCVPP                      | BR                                   | BR              |
| B                                                                                                                          | ABVD                     | BeGeV                                                  |                            |                                      |                 |
| C                                                                                                                          | ABVD                     | BR                                                     |                            |                                      |                 |
| D                                                                                                                          | ABVD                     | Brentuximab                                            |                            |                                      |                 |
| E                                                                                                                          | ABVD                     | Brentuximab                                            | BCVPP                      | MACE-CytaBOM                         |                 |
| F                                                                                                                          | ABVD                     | GND                                                    | Bendamustine               | ICE                                  |                 |
| G                                                                                                                          | ABVD                     | ICE                                                    |                            |                                      |                 |
| H                                                                                                                          | ABVD                     | ICE                                                    |                            |                                      |                 |
| I                                                                                                                          | ABVD                     | ICE                                                    | Brentuximab                |                                      |                 |
| J                                                                                                                          | ABVD                     | ICE                                                    | Brentuximab + Bendamustine |                                      |                 |
| K                                                                                                                          | ABVD                     | ICE                                                    | GVD                        | Brentuximab                          | Nivolumab       |
| L                                                                                                                          | ABVD                     | Nivo                                                   | Brentuximab                | BR                                   |                 |
| M                                                                                                                          | ABVD                     | RGVP                                                   |                            |                                      |                 |
| N                                                                                                                          | ABVD + obinutuzumab      | ICE                                                    |                            |                                      |                 |
| O                                                                                                                          | AV                       | Nivolumab                                              | Brentuximab                | PEC                                  |                 |
| P                                                                                                                          | AVD                      | Brentuximab                                            |                            |                                      |                 |
| Q                                                                                                                          | AVD+ ibrutinib           | Nivolumab + ibrutinib                                  | Brentuximab                |                                      |                 |
| R                                                                                                                          | BCVPP                    | Brentuximab                                            | ABVD                       | GVP                                  |                 |
| S                                                                                                                          | BR                       | Rituximab + ICE                                        |                            |                                      |                 |
| T                                                                                                                          | Brentuximab              | AVD                                                    | Bendamustine               |                                      |                 |
| U                                                                                                                          | Brentuximab              | GND                                                    |                            |                                      |                 |
| V                                                                                                                          | Brentuximab + rituximab  | ABVD                                                   |                            |                                      |                 |
| W                                                                                                                          | CHOP                     | GN                                                     |                            |                                      |                 |
| X                                                                                                                          | CHOP                     | RGDP                                                   | RICE                       | EBV-directed cytotoxic T-lymphocytes |                 |
| Y                                                                                                                          | GND                      | Nivolumab                                              | Brentuximab                |                                      |                 |
| Z                                                                                                                          | ICE                      | Rituximab                                              |                            |                                      |                 |
| AA                                                                                                                         | RCHOP                    | Trial bendamustine, ofatumumab, carboplatin, etoposide |                            |                                      |                 |
| BB                                                                                                                         | R-miniCHOP               | Brentuximab                                            | Pembrolizumab              |                                      |                 |
| CC                                                                                                                         | Vinblastine/chlorambucil | Brentuximab                                            | GVP                        | Vinblastine                          |                 |

ABVD = adriamycin, bleomycin, vinblastine, and dacarbazine; BCVPP = carmustine, cyclophosphamide, vinblastine, procarbazine, and prednisone; BeGeV = bendamustine, gemcitabine, vinorelbine; BR = bendamustine and rituximab; EBV = Epstein Barr Virus; GDP = gemcitabine, dexamethasone, cisplatin; GND = gemcitabine, navelbine, doxorubicin; GVP = Gemcitabine, vinorelbine, prednisone; ICE = ifosfamide, carboplatin, etoposide; MACE-CytaBOM = cyclophosphamide, doxorubicin, etoposide, cytozar, bleomycin, vincristine, methotrexate and prednisone; PEC = prednisone, etoposide, cyclophosphamide; RCHOP = rituximab, cyclophosphamide, doxorubicin, vincristine, prednisone

| <b>Supplemental Table 7. Statistical Significance of Cox Analysis of Overall Survival Based on First Hodgkin Transformation Treatment Before and After Adjusting for Age</b>                                          |                                        |                                        |
|-----------------------------------------------------------------------------------------------------------------------------------------------------------------------------------------------------------------------|----------------------------------------|----------------------------------------|
| <b>First Therapy for Hodgkin Transformation</b>                                                                                                                                                                       | <b>p-value After Adjusting for Age</b> | <b>p-value After Adjusting for Age</b> |
| ABVD- Full                                                                                                                                                                                                            | (Reference Group)                      | (Reference Group)                      |
| ABVD-Reduced                                                                                                                                                                                                          | 0.043                                  | 0.048                                  |
| Brentuximab                                                                                                                                                                                                           | 0.054                                  | 0.052                                  |
| No Treatment                                                                                                                                                                                                          | 0.00004                                | 0.0001                                 |
| Other                                                                                                                                                                                                                 | 0.00004                                | 0.0002                                 |
| RCHOP                                                                                                                                                                                                                 | 0.481                                  | 0.48                                   |
| ABVD = adriamycin, bleomycin, vinblastine, and dacarbazine; RCHOP = rituximab, cyclophosphamide, doxorubicin, vincristine, prednisone; Other = See supplemental Table 5 for full description of the included regimens |                                        |                                        |



## Supplemental Figures

### Supplemental Figure Legends

**Supplemental Figure 1.** (A) Progression-free survival (PFS) for patients with Hodgkin Transformation (HT) without censoring at time of hematopoietic stem cell transplant (HCT). 2-year PFS 48%, 95% CI 38% - 61% (B) PFS for patients with Hodgkin Transformation (HT) without censoring at time of hematopoietic stem cell transplant (HSCT). 2-year PFS = 48.9%, 95% CI 38.7 – 61.8%.

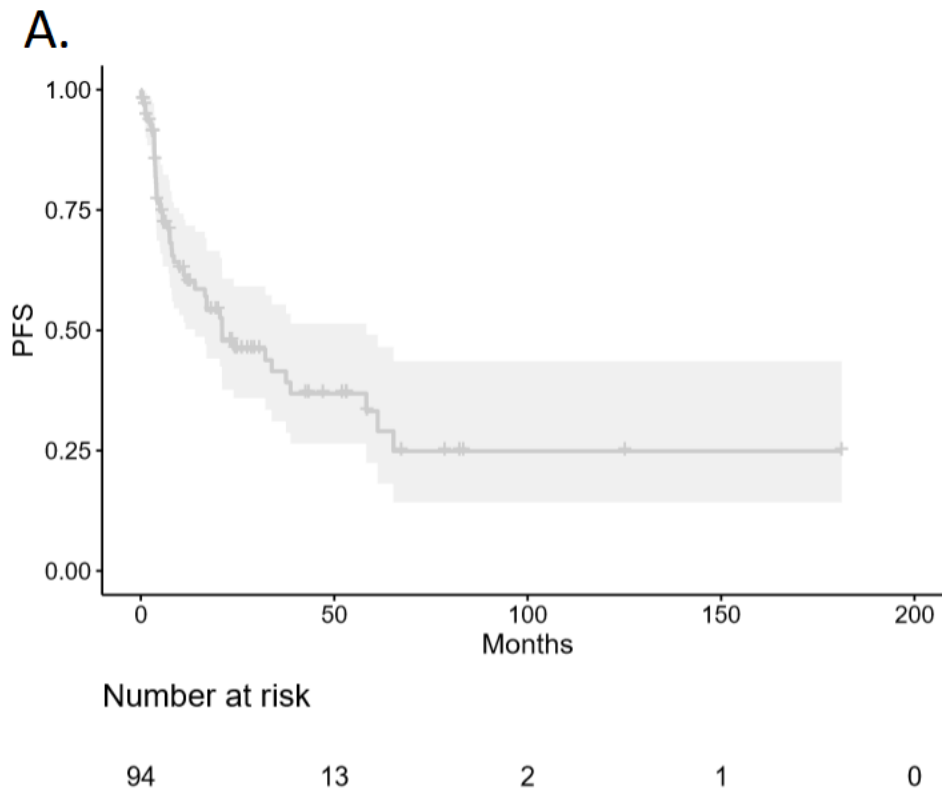

**B.**

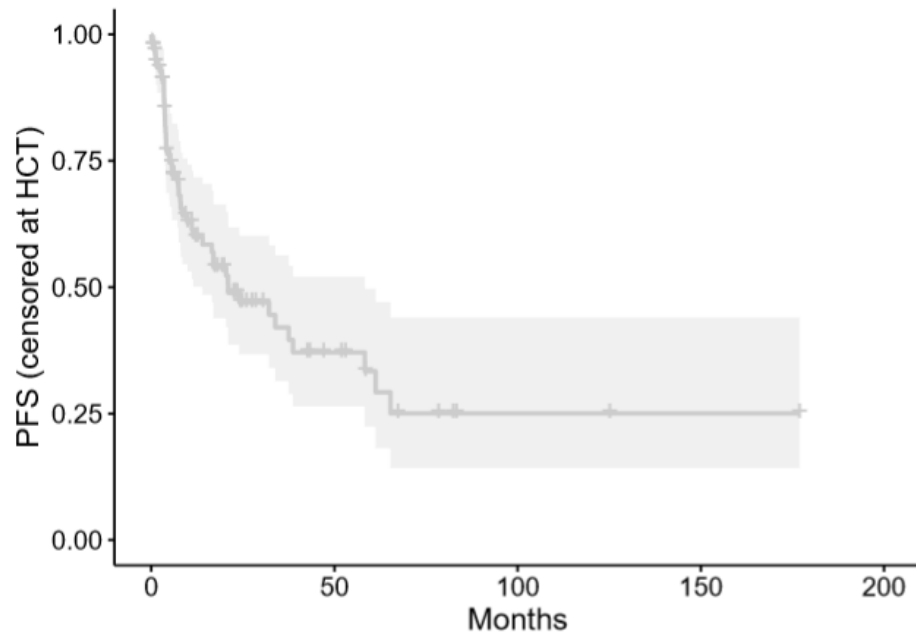

Number at risk

94      12      2      1      0

**Supplemental Figure 2.** Overall survival for patients with Hodgkin Transformation (HT) based on year of first HT therapy.

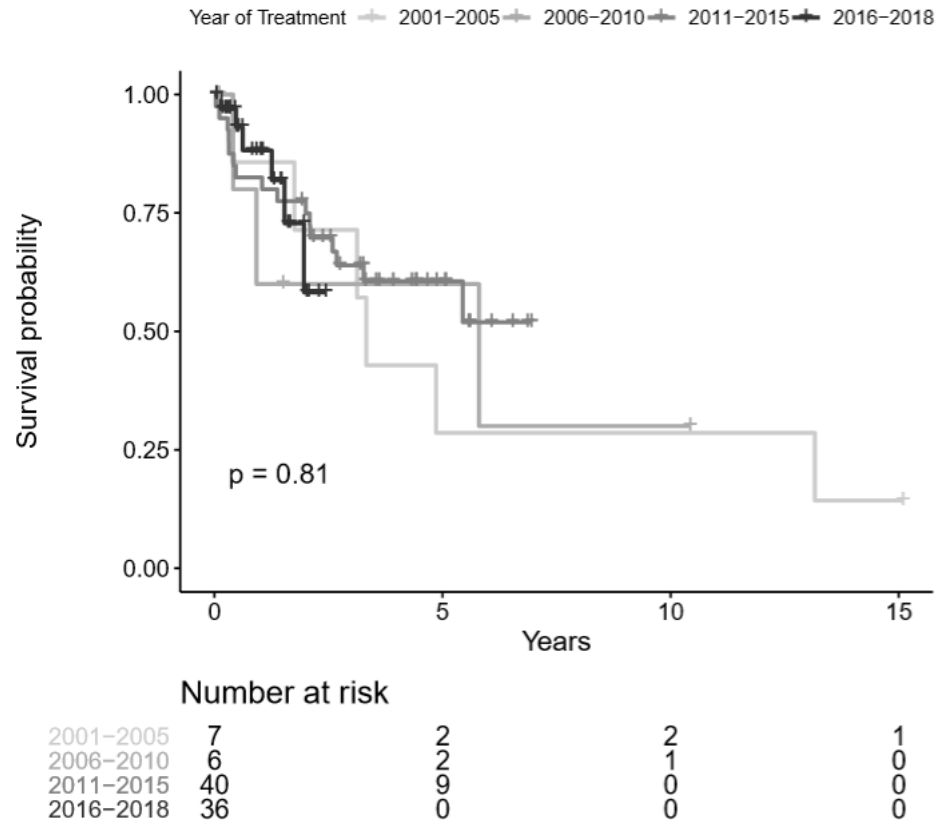

**Supplemental Figure 3.** Overall survival for patients with Hodgkin Transformation based on prior chronic lymphocytic leukemia-directed therapies. BTKi = Bruton’s tyrosine kinase inhibitor. Purine = purine analogue therapy.

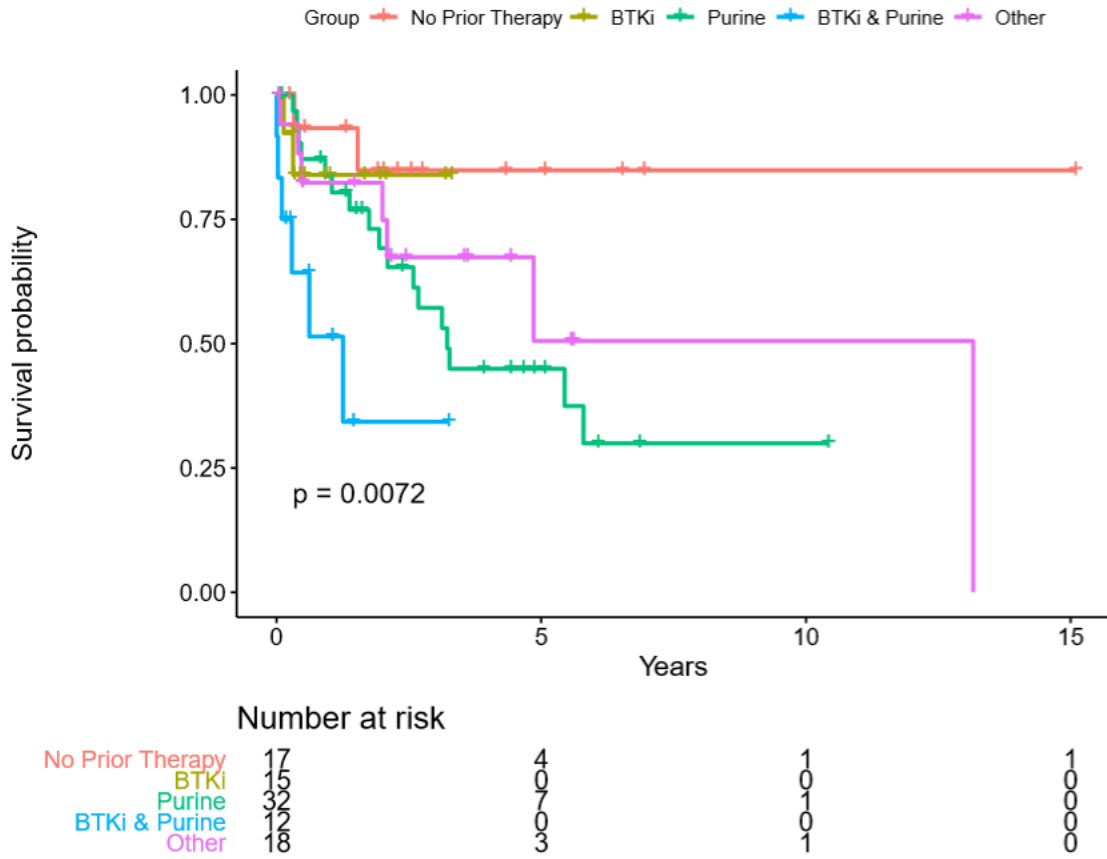

Supplement: 2020_256388_STEPHENS_SUPPL.pdf [file 2020_256388_STEPHENS_SUPPL.pdf]
